# Supplementary material for: Transcriptomic and Metabolomic Analysis of Anthocyanin and Carotenoid Biosynthesis in Red and Yellow Fruits of Sweet Cherry (Prunus avium L.) during Ripening
Source: Research Square preprint supplement (doi:10.21203/rs.3.rs-2598311/v1), 2023-03-02
Supplement: Supplementary file 1 [file 09b14ff4505db4186945cce8.docx]

**Supplementary Fig. S1** Correlation (R2) of the expression levels of the 11 genes (*CHS*, *CHI*, *F3H*, *F3′H*, *DFR*, *ANS*, *UFGT*, *PDS*, *HYB*, *LCYB*, *LCYE*) measured by qRT-PCR and RNA-seq.
