# Supplementary material for: Transcriptomic and Metabolomic Analysis of Anthocyanin and Carotenoid Biosynthesis in Red and Yellow Fruits of Sweet Cherry (Prunus avium L.) during Ripening
Source: Research Square preprint supplement (doi:10.21203/rs.3.rs-2598311/v1), 2023-03-02
Supplement: Supplementary file 2 [file f15d01d0ef625643c612d4dd.docx]

**Supplementary Table 1**

Basic information of reference genome.

| NCBI Reference Sequence | NW_018922178.1 |
| --- | --- |
| Assembly Provider | Kazusa DNA Research Institute |
| Assembly Method | SOAPdenovo v. 2-rev240; GapCloser v. 1.10 |
| Assembly Name | PAV_r1.0 |
| Genome Coverage | 327x |
| Sequencing Technology | Illumina HiSeq 2000 |

**Supplementary Table 2**

The assembly statistic of the RNA-seq in this study.

|  | PAV_r1.0 |
| --- | --- |
| Estimated genome size (bp) | 352,883,670 |
| Number of scaffolds | 10,148 |
| Size of scaffolds (bp) | 272,361,615 |
| Scaffold N50 (bp) | 219,566 |
| Longest scaffold (bp) | 1,460,269 |
| GC (%) | 37.7 |
| Mean size of genes (bp) | 1,097 |
| Repeat (%) | 43.8 |

**Supplementary Table 3**

The FPKM values underlying the heatmap from the transcriptome mapping data.

| Gene name | Gene ID | Gene length | FPKMa | | | | | | | |
| --- | --- | --- | --- | --- | --- | --- | --- | --- | --- | --- |
| Stage 1 | | Stage 2 | | Stage 3 | | Stage 4 | |
| JNH_S1 | CY_S1 | JNH_S2 | CY_S2 | JNH_S3 | CY_S3 | JNH_S4 | CY_S4 |
| *PAL* | 110748671 | 1807 | 15.480 | 67.217 | 19.723 | 50.550 | 47.043 | 5.930 | 184.357 | 2.460 |
| *C4H* | 110750787 | 3544 | 266.053 | 680.623 | 304.750 | 267.917 | 375.540 | 208.727 | 1315.527 | 305.510 |
| *4CL* | 110758567 | 3818 | 7.583 | 7.287 | 6.703 | 4.293 | 21.180 | 3.270 | 169.313 | 2.047 |
| *CHS* | 110758924 | 2440 | 2.583 | 6.593 | 6.580 | 0.707 | 17.317 | 0.053 | 374.413 | 0.330 |
|  | BGI_novel_G000094 | 1897 | 3.310 | 6.577 | 4.577 | 1.220 | 20.067 | 0.130 | 397.700 | 0.573 |
| *CHI* | 110745765 | 1443 | 18.920 | 57.477 | 25.193 | 12.927 | 183.110 | 10.247 | 924.200 | 8.013 |
| *F3H* | 110758277 | 1994 | 34.690 | 74.277 | 52.360 | 47.783 | 269.347 | 21.393 | 989.887 | 13.070 |
| *F3’H* | 110753332 | 2528 | 63.473 | 35.080 | 58.933 | 25.510 | 164.737 | 14.793 | 714.377 | 21.210 |
| *DFR* | 110771557 | 2252 | 80.493 | 90.483 | 76.390 | 68.033 | 259.210 | 55.153 | 2006.030 | 50.067 |
| *ANS* | 110747768 | 1667 | 109.233 | 172.197 | 89.220 | 145.413 | 1005.627 | 134.663 | 2688.480 | 131.307 |
| *UFGT* | 110749579 | 1702 | 0.617 | 0.330 | 0.557 | 0.243 | 359.253 | 5.250 | 2248.373 | 1.953 |
| *PSY* | 110765927 | 2783 | 17.750 | 19.423 | 16.827 | 13.423 | 8.380 | 3.957 | 7.380 | 4.293 |
| *PDS* | 110747173 | 10762 | 20.300 | 20.573 | 19.997 | 21.723 | 15.983 | 11.063 | 11.397 | 10.333 |
| *HYB/BCH* | 110767732 | 2315 | 59.533 | 98.763 | 39.383 | 40.633 | 26.550 | 34.103 | 26.537 | 49.017 |
| *LCY-B* | 110770275 | 3176 | 6.010 | 5.523 | 4.717 | 3.613 | 2.890 | 1.860 | 1.347 | 1.220 |
| *LCY-E* | 110749277 | 4150 | 7.640 | 10.873 | 5.273 | 5.683 | 6.030 | 5.770 | 4.907 | 5.957 |
| *ZEP* | 110765909 | 6573 | 21.923 | 28.263 | 17.820 | 13.347 | 59.350 | 39.347 | 39.813 | 49.280 |

a FPKM= total exon fragments / mapped reads (millions) * exon length (kb)

**Supplementary Table 4**

Specific primers pairs for selected genes used in qRT-PCR.

| Primers | Sequences (5’-3’) | Base (bp) |
| --- | --- | --- |
| *CHS-F* | CTTTGGGCATCTCGGATT | 18 |
| *CHS-R* | TCAACAGTGAGTCCTGGTCC | 20 |
| *CHI-F* | TCCACCGTCAGTCAAACCAC | 20 |
| *CHI-R* | CCTCCAAGTACACGCCAATC | 20 |
| *F3H-F* | TTGTGGAGGCTTGTGAGGAT | 20 |
| *F3H-R* | AAATGGCTGGAGACGATGAA | 20 |
| *F3'H-F* | TGTTGACTACTTTGCTCTCGC | 21 |
| *F3'H-R* | GTTCTTGTTGGACTTGGGC | 19 |
| *DFR-F* | GAATCTGTTGTGTGACGGG | 19 |
| *DFR-R* | TCCATAGGAGTGGCGACAT | 19 |
| *ANS-F* | GCTACCGCCGAGTATGCTAA | 20 |
| *ANS-R* | TGGAACACACTTGGCAGAGA | 20 |
| *UFGT-F* | ATGTCGGACCTTTCAACCTA | 20 |
| *UFGT-R* | GGCACCACCATCCCATTACT | 20 |
| *PDS-F* | CCTCTGTCGTCACTCGATCA | 20 |
| *PDS-R* | ATAATTGGCGGACAGGCATA | 20 |
| *LCYE-F* | CAACTGGATATTGAGGGCATCA | 22 |
| *LCYE-R* | CAAGGAAACCGTGCCACATC | 20 |
| *LCYB-F* | GGCTATATGGTGGCAAGGACTT | 21 |
| *LCYB-R* | CAGAATTGAGGCTTCGAACGA | 22 |
| *HYB-F* | TTTGGGATGGCCTACATGTTC | 21 |
| *HYB-R* | GGCACGTCGGCAATGG | 16 |
| *LCYB2-F* | CCCTATTTCCATTAGGCCGC | 20 |
| *LCYB2-R* | CACGTCATATCGAATACGATC | 21 |
| *β-ACTIN*-F | CCAGGGCTGTGTTTCCTTCTA | 21 |
| *β-ACTIN*-R | ATGATCTGCGTCATCTTTTCT | 21 |
